# Supplementary material
Source: publisher figshare collection journal article supplement (https://gsapubs.figshare.com/ndownloader/files/23313989)
Supplement: Supplementary file 1 [file 23313989]

## **THE NORTHERN CALCAREOUS ALPS: GEODYNAMICAL CONTEXT AND TECTONO-STRATIGRAPHIC FRAMEWORK**

The Northern Calcareous Alps of Austria comprise Permian to Eocene rocks which became involved in the Eastern Alps tectonic wedge since the beginning of the Eo-Alpine shortening (e.g., Schmid et al., 2008). The Northern Calcareous Alps are dominated by thick non-metamorphic Triassic carbonates deposited on the northern shelf of the formerly south-facing margin of the Neo-Tethys Ocean. With the onset of N- to NW-directed convergence and closure of the Neo-Tethys Ocean, the former passive margin became an active fold-and-thrust belt since Middle-Late Jurassic times. Traditionally, the NCA have been divided in three major tectonic units, which from south to north are the Juvavikum nappes, the Tirolikum nappes and the Bajuvarikum nappes (Fig. 1B). To some extent, these nappes reflect the former configuration of the Triassic Neo-Tethys margin, showing a deepening trend into the oceanic basin from N to S. However, significant controversy still exists in regards of their paleogeographic distribution, as well as in the ages, sequence, and mechanisms of thrust staking (see Tollmann, 1987; Mandl, 2000; Frisch and Gawlick, 2003). It is generally accepted that the Juvavic nappes overthrust the Tirolic nappes by Late Jurassic times, and that both together overthrust the external Bajuvaric nappes since Early Cretaceous times, but the scarcity of synorogenic strata hampers the dating of events. In the studied area, only uppermost Permian to Paleocene units are present; these are briefly described in the following. For detailed descriptions, the reader can refer to Tollmann, (1976a,b; 1985), Faupl and Wagreich (1994), Von Eynatten and Gaupp (1999), Mandl (2000) and Gawlick, Frisch (2003) and Leitner et al., (2017).

## 23 **Uppermost Permian and latest Triassic - rift to post-rift and evaporite sedimentation**

24 Permian sedimentation was controlled by the break-up of Pangea and the subsequent  
25 opening of the Neo-Tethys Ocean. Massive red-colored alluvial fan deposits of the syn-rift  
26 Prebichl Fm. were unconformably deposited as fault-bound wedges on Variscan metamorphic  
27 basement. During the syn- to post-rift transition in Late Permian times, the Haselgebirge Fm.  
28 evaporites were deposited. These can consists of up to 70% of halite, but generally about  
29 55%, with the remaining proportion of variegated claystones, gypsum and anhydrite. With the  
30 sedimentation of transgressive red-colored shallow-water sandstones occasionally interlayered  
31 with thin limestone beds (i.e., Werfen Fm.) in the latest Triassic, the post-rift phase of the  
32 Neo-Tethys begun. The Lower Triassic Reichenhall Fm. was deposited on top and consists of  
33 anhydrite, gypsum and carbonate breccias. The Haselgebirge-Werfen-Reichenall Fms. can be  
34 potentially considered all together a layered evaporitic sequence. As today, this sequence  
35 occurs as highly-strained clay-mantled gypsum/anhydrite bodies and rauhwacke (i.e., a  
36 distinct type of evaporite dissolution breccia constituting the weathered and leached remnants  
37 of what were once 'weak' salt-entraining layers (see Warren, 2006; p 486). Under stress, their  
38 evaporitic precursors act as rheological inhomogeneities providing décollement-prone  
39 surfaces during orogenic shortening. Halite, anhydrite and gypsum are the main constituents  
40 of these décollement layers.

## 41 **Middle Triassic – onset of salt tectonics on the Neo-Tethys continental margin**

42 By Middle Triassic times, ceasing clastic influx allowed the build-up of shallow  
43 marine ramp carbonates rimming the Neo-Tethys shelf. Thick isolated reefs (i.e., the  
44 Steinalm/Wetterstein Fms.) developed throughout the Anisian to early Carnian. The  
45 Wetterstein platforms accumulated significant amounts of carbonates (up to 1.75 km vertical  
46 thickness in the Gamsstein unit; Figs. 3, 4) in short periods of time (i.e., ca. 3 Myr.) during a  
47 well-established post-rift stage regionally dominated by thermal subsidence. Between those  
48 platforms, highly diverse basinal facies developed, from restricted shallow water

environments (i.e., Gutenstein Fm.) to deep water basins showing slope and basin transitions (i.e., Reifling Fm. and Partnach Fm., respectively). During the middle Carnian, carbonate growth halted during an eustatic sea-level drop and a global phase of increased humidity. During this period, shale, sandstones and coal were deposited (i.e., Reingraben and Lunz Fms.) within the basinal areas between the thick carbonate platforms of the Bajuvarikum and Tirolikum nappes. Sea level rise during the upper Carnian resulted in renewed carbonate production and precipitation of anhydrite/gypsum (i.e., Opponitz Fm.). The Middle Triassic of the studied area within the Bajuvarikum nappes is characterized by strong changes in facies and thickness, shifting through space and time, indicating an anomalously large and strongly localized subsidence compared to the expected thermal subsidence rates for a passive margin. All these features indicate subsidence and sedimentation largely controlled by the evacuation, inflation and deflation of the uppermost Permian to lowermost Triassic salt.

#### **Late Triassic - Penninic rifting and fall of Middle Triassic salt structures**

In Late Triassic times, an extensive Norian to Rhaetian carbonate shelf developed. Locally, this shelf reached as much as 2500 m thickness; however, it also displayed sharp changes in both facies and thickness. During the Norian, reefs developed along the shelf rims, but most of it consisted on a regionally extensive carbonate platform. Carbonates on the southern parts of the shelf were deposited in sub-tidal environments (i.e., Dachsteinkalk Fm.), whereas on the northern part of the shelf, intra- to supratidal conditions dominated the sedimentation of a wide dolomitic lagoon (i.e., Hauptdolomite Fm.). In the Rhaetian, localized subsidence aside of the Middle and Late Triassic depocentres caused the sedimentation of the Kössen Fm., a very heterogeneous carbonate system including deep basin facies fringed by coral build-ups and tidal flats, and unconformably overlying the Norian strata and the salt. Subsidence concentrated on the inflated salt was most likely caused by the onset of regional extension associated with the opening of the Penninic Ocean to the north (e.g., Channel et al., 1992); as the inflated salt areas represented the weakest parts of the

75 stratigraphic section, these reacted to regional extension by widening, leading to subsidence  
76 concentrated on the salt walls formed during Middle Triassic times, allowing the formation of  
77 a new array of minibasins (i.e., bowl minibasins) in between the Middle Triassic ones. Such  
78 process has been termed diapir fall (e.g., Vendeville and Jackson, 1992).

#### 79 **Jurassic – Penninic rift to drift and onset of Neo-Tethys closure**

80 Whereas the Triassic was dominated by large carbonate factories, the Jurassic shelves  
81 and basins hardly produced any platforms. Jurassic sediments were deposited on deep water  
82 starved basins (i.e., locally represented by bowl minibasins), including chert-bearing  
83 carbonates, layers of manganese oxide, hardgrounds and a local enrichment of ammonite and  
84 crinoid fauna. Only during the latest Jurassic, the carbonate reef production was re-  
85 established, with massive bodies of breccias and shallow water reefs indicating the onset of  
86 convergence and uplift related to the Neo-Tethys closure. While the central and northern part  
87 of the Northern Calcareous Alps shelf was affected by extension since the Rhaetian, the  
88 southern parts were already within an active N- to NW-directed fold-and-thrust belt. Evidence  
89 for this is found by the thrusting of the southernmost units over Middle Jurassic sediments  
90 (e.g., Gawlick et al., 1999).

#### 91 **Cretaceous Eo-Alpine and Gosau shortening phases**

92 The Cretaceous period of the Eastern Alps is characterized by two mayor tectonic  
93 phases: the Eo-Alpine phase in Early Cretaceous and the Gosau phase in Late Cretaceous-  
94 Paleocene times (Schmid et al., 2008). The Eo-Alpine phase is the continuation of the Jurassic  
95 convergence and closure of the Neo-Tethys, with the Tirolikum and Bajuvarikum nappes  
96 involved in the shortening accompanied by synorogenic sedimentation. A foreland basin  
97 began in Jurassic times, and continued throughout the Early Cretaceous mostly sourced by  
98 southerly-derived synorogenic sediments. During Late Cretaceous times, a wedge-top basin  
99 developed in a large part of the Northern Calcareous Alps. The pre-Gosau erosional relief was  
100 diachronously transgressed from northwest to southeast by shallow marine, and then slope

101 facies reflecting the gradual descent of the Alpine orogenic wedge towards a Penninic  
102 subduction trench (e.g, Faupl and Wagreich, 1994). Synorogenic deep sea fans were deposited  
103 on the Northern Calcareous Alps thrust wedge by the end of Eocene. The Northern  
104 Calcareous Alps were completely detached from their autochthonous crustal root and  
105 tectonically stacked onto the Penninic units.

### 106 **Alpine shortening and late orogenic collapse**

107 By the end of Eocene, the Adriatic and European continental lithospheres collided.  
108 Both, the salt-detached Northern Calcareous Alps fold-and-thrust belt and its synorogenic  
109 cover acquired an additional structural overprint during this stage (e.g., Wessely, 1992).  
110 During the Early Miocene, the fold-and-thrust belt was covered by an extensive wedge-top  
111 basin, while around Middle Miocene times, the European basement became involved in the  
112 Alpine shortening (e.g., Granado et al., 2016). Soon after, collapse of the hinterland parts of  
113 the Alpine tectonic wedge and related sedimentation took place during lateral extrusion and  
114 related strike-slip faulting (e.g., Ratschbacher et al., 1999; Strauss et al., 2001).

### 116 **REFERENCES**

117 Channell, J.E.T., Brandner, R., Spieler, A., Stoner, J.S., 1992, Paleomagnetism and  
118 paleogeography of the Northern Calcareous Alps (Austria): *Tectonics*, v. 11, p. 792–810,  
119 doi:10.1029/91TC03089.

120 Faupl, P., Wagreich, M., 1994, Late Jurassic to Eocene Palaeogeography and  
121 Geodynamic Evolution of the Eastern Alps: *Mitteilungen der Österreichischen Geologischen*  
122 *Gesellschaft*, v. 92, p. 79-94.

123 Frisch, W., Gawlick, H.J., 2003, The nappe structure of the central Northern  
124 Calcareous Alps and its disintegration during Miocene tectonic extrusion—a contribution to  
125 understanding the orogenic evolution of the Eastern Alps: *International Journal of Earth*  
126 *Sciences (Geologische Rundschau)*: v. 92, p. 712-727, doi:10.1007/s00531-003-0357-4.

127           Gawlick H.J., Frisch, W., Vecsei, A., Steiger, T., Böhm, F., 1999, The change from  
128    rifting to thrusting in the Northern Calcareous Alps as recorded in Jurassic sediments:  
129    International Journal of Earth Sciences (Geologische Rundschau), v. 87, p. 644–657, doi  
130    10.1007/s005310050237.

131           Gawlick, H.J., Frisch, W., 2003, The Middle to Late Jurassic carbonate clastic  
132    radiolaritic flysch sediments in the Northern Calcareous Alps: Sedimentology, basin  
133    evolution, and tectonics-An overview: Neues Jahrbuch für Geologie und Paläontologie, v.  
134    230, p. 163-213.

135           Granado, P., Thöny, W., Carrera, N., Grazter, O., Strauss, P., Muñoz, J.A., 2016,  
136    Basement-involved reactivation in foreland fold-and-thrust belts: the Alpine–Carpathian  
137    Junction (Austria): Geological Magazine, v. 153, p. 1110-1135,  
138    doi:10.1017/S0016756816000066.

139           Mandl, G.W., 2000, The Alpine sector of the Tethyan shelf - examples of Triassic to  
140    Jurassic sedimentation and deformation from the Northern Calcareous Alps: Mitteilungen der  
141    Österreichischen Geologischen Gesellschaft, v. 92, p. 61-77.

142           Ratschbacher, L., Frisch, W., Linzer, H. G., Merle, O. 1991, Lateral extrusion in the  
143    Eastern Alps, 2. Structural analysis: Tectonics v. 10, p. 257–271, doi:10.1029/90TC02623.

144           Schmid, S. M., Bernoulli, D., Fügenschuh, B., Matenco, L., Schefer, S., Schuster, R.,  
145    and Ustaszewski, K., 2008, The Alpine-Carpathian-Dinaridic orogenic system: correlation  
146    and evolution of tectonic units: Swiss Journal of Geosciences, v. 101, p. 139-183, doi:  
147    10.1007/s00015-008-1247-3.

148           Strauss, P., Wagreich, M., Decker, K., Sachsenhofer, R.F., 2001, Tectonics and  
149    sedimentation in the Fohnsdorf-Seckau Basin (Miocene, Austria): from a pull-apart basin to a  
150    half-graben: International Journal of Earth Sciences (Geologische Rundschau), v. 90, p. 549–  
151    559, doi:10.1007/s005310000180.

152 Tollmann A (1976a) Analyse des klassischen nordalpinen Mesozoikums: Wien,  
153 Deuticke, 580 p.

154 Tollmann A (1976b) Der Bau der Nördlichen Kalkalpen: Wien, Deuticke, 449 p.

155 Tollmann, A., 1987, Late Jurassic/Neocomian gravitational tectonics in the Northern  
156 Calcareous Alps in Austria, in Flügel, H.W., Faupl, R., eds., Geodynamics of the Eastern  
157 Alps: Wien, Deuticke, p. 112-125.

158 Vendeville, B., Jackson, M.P.A., 1992, The fall of diapirs during thin-skinned  
159 extension: Marine and Petroleum Geology, v. 9, 354-371, doi: 10.1016/0264-8172(92)90048-  
160 J.

161 Von Eynatten, H., Gaupp, R., 1999, Provenance of Cretaceous synorogenic sandstones  
162 in the Eastern Alps: constraints from framework petrography, heavy mineral analysis and  
163 mineral chemistry: Sedimentary Geology, v. 124, p. 81-111, doi: 10.1016/S0037-  
164 0738(98)00122-5.

165 Warren, J.K., 2006, Evaporites: sediments, resources and hydrocarbons: Berlin,  
166 Springer, 1035 p.

167 Wessely, G., 1992, The Calcareous Alps below the Vienna Basin in Austria and their  
168 structural and facial development in the Alpine-Carpathian border zone: Geologica  
169 Carpathica, v. 43, p. 347-353.
